# Supplementary material
Source: publisher figshare collection journal article supplement (https://gsajournals.figshare.com/ndownloader/files/13829306)
Supplement: Supplementary file 1 [file 13829306]

**Table S2 List of repair templates**

| **Target** | **Figure** | **Template strand** | **Strand** | **Sequence of repair template (5’ to 3’)** | **Related guide** | **Oligo  name** |
| --- | --- | --- | --- | --- | --- | --- |
| *dpy-10* | All but 1, 8, 9A | spacer | coding | CACTTGAACTTCAATACGGCAAGATGAGAATGACTGGAAACCGTACCGCatGcGGTGCCTATGGTAGCGGAGCTTCACATGGCTTCAGACCAACAGCCTAT | crispr_bf32 | BF-1813 |
| *rol-6* | 1 | protospacer | coding | TGTGGGTTGATATGGTTAAACTTGGAGCAGGAACCGCTTCCAACCGTGTGcGctGcCAACAATATGGAGGATATGGAGCCACTGGTGTTCAGCCACCAGCACCAAC | crispr_bf33 | BF-1474 |
| *lir-2* | 2A | protospacer | non-coding | CTTGGCGCTAATTCAAACCAAACTTACATCTCGGCTGATTaTCGCAGTTgcGGGGCCATaAGCTGCCAACATGACTGTCACTGATCTGAAAATGCTATTT | crispr_bf8 | BF-2059 |
| Chr. I | 2A | protospacer | intergenic | CTTGTCTCTTCTTTTGACAAAACTTCAAAGAAATCGCCGAgTTGCGAGGtaGGGGGAGCcAAAAATAATTGATTACTGTACATCTTTATTTTTTAATTCG | crispr_bf27 | BF-2062 |
| *sex-1* (GG) | 2A | protospacer | non-coding | TATTTGAAGGTGAATTGTGTTGGAATGAAAACGGATGAGAtTCTGACAAtcGTGGCTAGgAGTGAACGGGAGTCTGTTGTTGATTTGGCGTTGGCTGCTG | crispr_bf4 | BF-2065 |
| *lir-2* | 2B | spacer | coding | AAATAGCATTTTCAGATCAGTGACAGTCATGTTGGCAGCTtATGGCCCCgcAACTGCGAtAATCAGCCGAGATGTAAGTTTGGTTTGAATTAGCGCCAAG | crispr_bf8 | BF-2058 |
| Chr. I | 2B | spacer | intergenic | CGAATTAAAAAATAAAGATGTACAGTAATCAATTATTTTTgGCTCCCCCtaCCTCGCAAcTCGGCGATTTCTTTGAAGTTTTGTCAAAAGAAGAGACAAG | crispr_bf27 | BF-2063 |
| *sex-1* (GG) | 2B | spacer | coding | CAGCAGCCAACGCCAAATCAACAACAGACTCCCGTTCACTcCTAGCCACgaTTGTCAGAaTCTCATCCGTTTTCATTCCAACACAATTCACCTTCAAATA | crispr_bf4 | BF-2064 |
| *sex-1* (GG) | 3A (left) | protospacer | non-coding | ACTACATTAAAGCGAAATTATTTGAAGGTGAATTGTGTTGcAATGAAAAgGGATGAGAtTCTGACAAtcGTGGCTAGCAGTGAACGGGAGTCTGTTGTTGATTTGGCG TTGGCTGCTG | crispr_bf4 | BF-2136 |
| *sex-1* (GG) | 3A (right) | protospacer | non-coding | TATTTGAAGGTGAATTGTGTTGGAATGAAAACGGATGAGAATCTGACAAtcGTGGCTAGgAGTGAACGcGAGTCTGTaGTTGATTTGGCGTTGGCTGCTGTGGTTGA GGGCTCTGATG | crispr_bf4 | BF-2138 |
| *sex-1* (GG) | 3B (left) | spacer | coding | CAGCAGCCAACGCCAAATCAACAACAGACTCCCGTTCACTGCTAGCCACgaTTGTCAGAaTCTCATCCcTTTTCATTgCAACACAATTCACCTTCAAATAATTTCGCT TTAATGTAGT | crispr_bf4 | BF-2137 |
| *sex-1* (GG) | 3B (right) | spacer | coding | CATCAGAGCCCTCAACCACAGCAGCCAACGCCAAATCAACtACAGACTCgCGTTCACTcCTAGCCACgaTTGTCAGATTCTCATCCGTTTTCATTCCAACACAATTCA CCTTCAAATA | crispr_bf4 | BF-2139 |
| *sex-1* | 7 | spacer | coding | CCACAGCAGCCAACGCCAAATCAACAACAGACTCCCGTTCACTGCTAGCCACtTTTGTCAGATTCTCATCCGTTTTCATTCCAACACAATTCACCTTCAA | crispr_bf4 | BF-1801 |
| *sex-1* | 7 | spacer | coding | CCACAGCAGCCAACGCCAAATCAACAACAGACTCCCGTTCACTGCTAGCCACaTTTGTCAGATTCTCATCCGTTTTCATTCCAACACAATTCACCTTCAA | crispr_bf4 | BF-1802 |
| *sex-1* | 7 | spacer | coding | CCACAGCAGCCAACGCCAAATCAACAACAGACTCCCGTTCACTGCTAGCCACgTTTGTCAGATTCTCATCCGTTTTCATTCCAACACAATTCACCTTCAA | crispr_bf4 | BF-1803 |
| *sex-1* | 8A | protospacer | coding | TTAACAGGCAACGGAAGTGTTGAGAGTTGGAACATTTCCACAACGAGAGGtcatctatttaAGGCAGGTTTAAAAACGACAAATTTTCTCGAAGAATATTGAGTTGCTGTT | crispr_bf47 | BF-1473 |
| *Ce-ben-1* | 8A | protospacer | coding | GGAAGTGATATCCGATGAGCATGGGATCCAGCCTGATGGAACTTATctagagGGGAGAAAGTGATTTGCAGTTGGAAAGAATCAATGTCTACTATAATGA | crispr_bf41 | BF-2035 |
| *Cbr-ben-1* | 8B | protospacer | coding | GGGAAGTGATTTCCGACGAGCACGGAATTCAACCTGATGGAACCTACAtATGGTGGAGAGAGTGACTTGCAGCTCGAGCGCATCAATGTCTACTACAACG | crispr_bf39 | BF-2036 |
| *zen-4 (cle10* ts*)* | 9, S3 | protospacer | coding | GACCATCTTCAACTCTTCTTACTATGATTCGCCAATACATGATGGAAGCagACTACCAGCGaGTAGAGATTGCACGTCTCAAAGATTCTCTAAACGACAAGGATG | crispr_bf46 | BF-2046 |
| *coh-4* | 9B | protospacer | coding | AACGGATGACATTGAAGATATCGACGAGCTGGCAATGGCagacttcgactacaaagaccatgacggtgattataaagatcatgatatcgattacaaggatgacgatgacaagTAACTGTACAATTGTTTTTTCTTTTTTAATAGTTT | AFScr007 | AFS607 |
| *dpy-10* | 11, 12 | protospacer | non-coding | TAGGCTGTTGGTCTGAAGCCATGTGAAGCTCCGCTACCATAGGCACCACGgGCGGTACGGTTTCCAGTCATTCTCATCTTGCCGTATTGAAGTTCAAGTG | crispr_bf32 | BF-2369 |
| *sex-1* | 12 | protospacer | non-coding | ATTATTTGAAGGTGAATTGTGTTGGAATGAAAACGGATGAGAATCTGACAAAtGTGGCTAGCAGTGAACGGGAGTCTGTTGTTGATTTGGCGTTGGCTGCTGT | crispr_bf5 | BF-2479 |
| *zen-4* (+)(make *cle5* ts) | S3 | protospacer | coding | GACCATCTTCAACTCTTCTTACTATGATTCGCCAATACATGATGGAAGCtaACTACCAGCGAGTAGAGATTGCACGTCTCAAAGATTCTCTAAACGACAAG | crispr_bf25 | AFS574 |
| *zen-4 (cle5* ts*)* | S3 | protospacer | coding | GACCATCTTCAACTCTTCTTACTATGATTCGCCAATAtATGATGGAAGCagACTACCAGCGAGTAGAGATTGCACGTCTCAAAGATTCTCTAAACGACAAG | crispr_bf25 | BF-2025 |
| *lir-2* | S5 | protospacer | non-coding | TTGGCGCTAATTCAAACCAAACTTACATCTCGGCTGATTTTCGCAGTTCnGGGGCCATTAGCTGCCAACATGACTGTCACTGATCTGAAAATGCTATTTT | crispr_bf8 | BF-1841 |
| *atf-2* | S5 | spacer | coding | ATTTTTATTTTTCAGATGGACGTCGACTCGGCATCATTGTCACCGTCCTCnAGACTTTCGGTGGTTTGTTCGGCATCCGCCGAGTTCTCATCGAGCTCGT | crispr_bf3 | BF-1814 |
| Chr. I | S5 | spacer | intergenic | TTGTCTCTTCTTTTGACAAAACTTCAAAGAAATCGCCGACTTGCGAGGAnGGGGGAGCGAAAAATAATTGATTACTGTACATCTTTATTTTTTAATTCGA | crispr_bf27 | BF-1898 |

For each experiment involving HDR using a single-stranded repair template, this table lists the locus that was edited, the figure in which the experiment is presented, the nature of the template strand, whether the protospacer strand or spacer strand and whether the coding or non-coding strand (or intergenic region), the DNA sequence of the repair template, including SNPs highlighted in red letters, the reference name of the guide used for the experiment, and the reference name of the oligonucleotide repair template.
